# Supplementary material
Source: PubMed Central journal article supplement (PMC3153567)
Supplement: NIHMS310709-supplement-1_si_001.pdf [file NIHMS310709-supplement-1_si_001.pdf]

## SUPPORTING INFORMATION

Table S1: A summary of percentage dimer formation in receptors containing the IL3 Cys mutations. The percentage of Dimer was calculated by dividing the dimer band intensity by the total (dimer plus monomer) intensity multiplied by 100%.

| Ste2p IL3 Cys<br>Mutant | Percentage of Dimer formation (%) <sup>a</sup> |                  |                             |
|-------------------------|------------------------------------------------|------------------|-----------------------------|
|                         | No<br>treatment                                | CuP<br>treatment | $\alpha$ -factor<br>and CuP |
| Cys-less                | 2.3                                            | 2.5              | 2.6                         |
| V224C                   | 2.1                                            | 2.7              | 2.5                         |
| K225C                   | 2.5                                            | 7.6              | 3.0                         |
| L226C                   | 2.4                                            | 2.9              | 2.5                         |
| I227C                   | 3.1                                            | 8.7              | 4.7                         |
| L228C                   | 4.4                                            | 9.7              | 5.3                         |
| A229C                   | 2.8                                            | 9.3              | 3.5                         |
| I230C                   | 7.5                                            | 15.5             | 8.3                         |
| R231C                   | 7.8                                            | 35.6             | 26.3                        |
| S232C                   | 18.1                                           | 45.6             | 40.3                        |
| R233C                   | 23.7                                           | 85.7             | 86.7                        |
| R234C                   | 16.7                                           | 65.1             | 68.3                        |
| F235C                   | 11.1                                           | 60.3             | 61.6                        |
| L236C                   | 22.6                                           | 94.8             | 96.2                        |
| G237C                   | 9.8                                            | 53.9             | 56.4                        |

|       |      |      |      |
|-------|------|------|------|
| L238C | 9.3  | 55.6 | 56.2 |
| K239C | 26.2 | 92.5 | 94.2 |
| Q240C | 8.9  | 55.4 | 54.1 |
| F241C | 12.5 | 22.6 | 18.6 |
| D242C | 11.4 | 15.8 | 14.7 |
| S243C | 6.5  | 11.6 | 9.4  |
| F244C | 5.5  | 11.4 | 12.0 |
| H245C | 5.3  | 23.2 | 17.5 |
| I246C | 7.1  | 30.8 | 29.3 |
| L247C | 6.4  | 22.5 | 7.1  |
| L248C | 2.8  | 11.5 | 2.9  |
| I249C | 3.3  | 12.6 | 3.6  |
| M250C | 4.5  | 15.8 | 5.2  |
| S251C | 3.1  | 21.5 | 6.2  |
| S252C | 2.5  | 3.2  | 2.8  |
| Q253C | 4.1  | 22.0 | 4.8  |

<sup>a</sup>Each measurement was done several times. The differences between measurements for any one receptor and any one condition were not more than 15% among duplicates or triplicates.

A

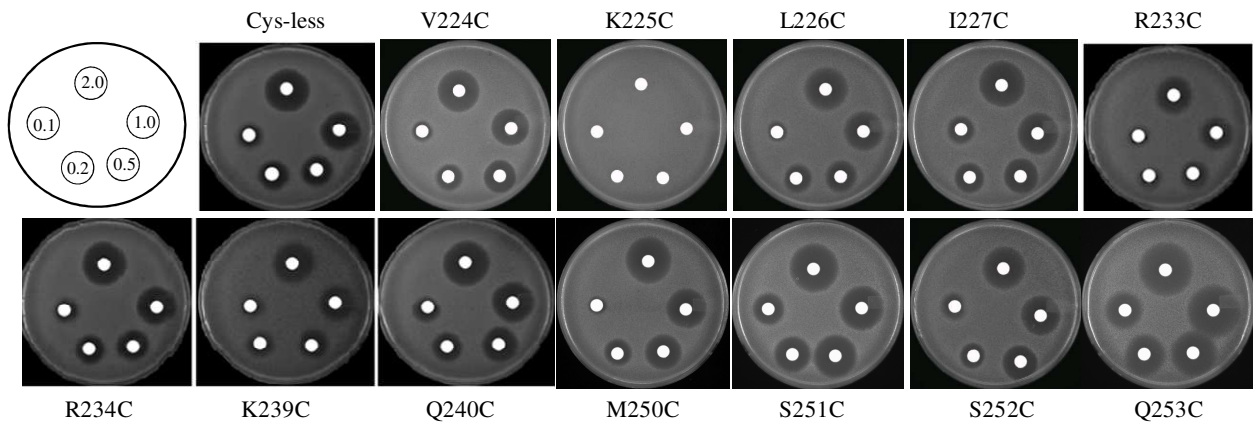

B

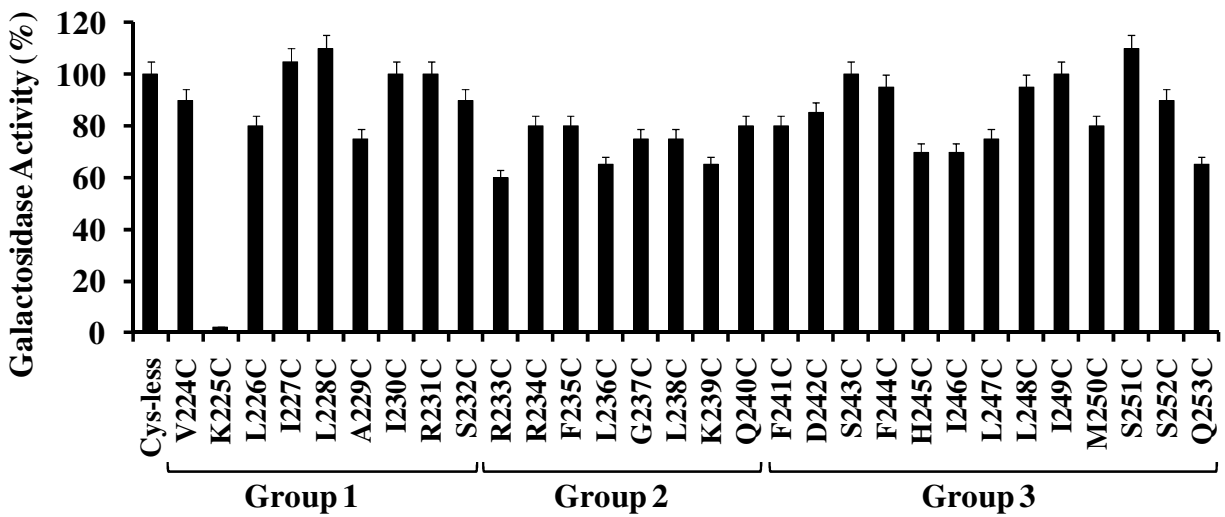

Figure S1. Phenotypes of IL3 Cys mutants. **A**: Growth arrest assay plates showing the response (halo around discs) of cells expressing the various mutants to different  $\alpha$ -factor pheromone concentration (0.1 – 2.0  $\mu\text{g}$ ). Only four representatives from each group are shown. **B**: Relative (%)  $\beta$ -galactosidase activity of the IL3 Cys mutants in the presence of  $\alpha$ -factor (1.0  $\mu\text{M}$ ).

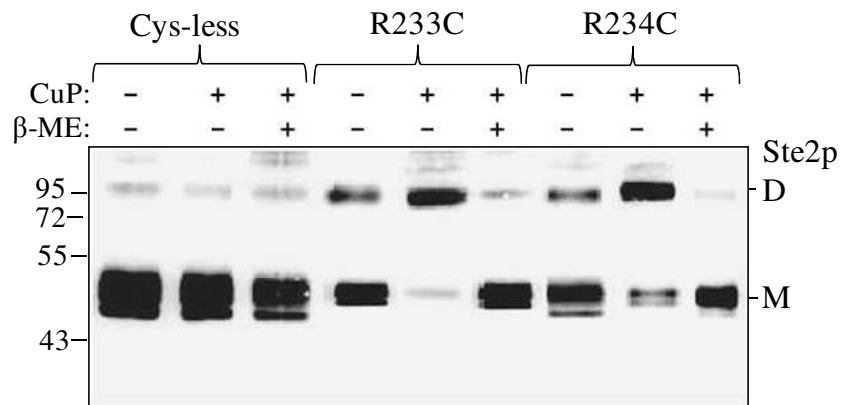

Figure S2. Dimerization of Cysless Ste2p, R233C, and R234C Ste2p mutants. Membrane samples were untreated or treated with 1.0  $\mu$ M CuP reagent with or without  $\beta$ ME (4%). M, monomer (53-55 kDa) ; D, dimer (106-110 kDa).

A

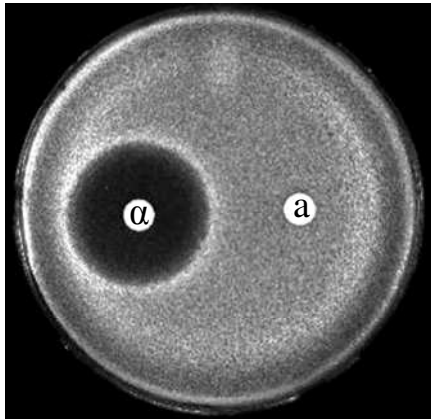

B

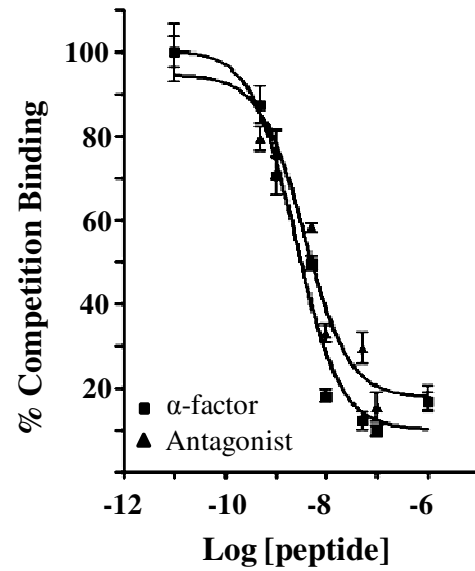

Figure S3: Growth arrest and binding activities of  $\alpha$ -factor antagonist. **A:** Growth arrest assay plate showing the response (halo around discs) of cells expressing Ste2p to  $\alpha$ -factor ( $\alpha$ ) and  $\alpha$ -factor antagonist (**a**) at 2.0  $\mu$ g concentration each. A halo is observed around the disc containing  $\alpha$ -factor ( $\alpha$ ) but no halo around disc containing  $\alpha$ -factor antagonist. **B:** Binding curves of  $\alpha$ -factor and  $\alpha$ -factor antagonist. Both peptides exhibited similar binding affinity to Ste2p.
